# Supplementary material
Source: PubMed Central journal article supplement (PMC4704198)
Supplement: AAC.01813-15_zac001164781so1.pdf [file AAC.01813-15_zac001164781so1.pdf]

## Supplementary material:

### Characterization of antimicrobial peptide, Penisin, a Class Ia Noval Lantibiotic from a *Paenibacillus* sp. Strain A3

Piyush Baidara<sup>1</sup>, Vasvi Chaudhry<sup>1</sup>, Garima Mittal<sup>1</sup>, Luciano M. Liao<sup>2</sup>, Carolina O. Matos<sup>2</sup>, Neeraj Khathri<sup>1</sup>, Octavio L. Franco<sup>3,4</sup>, Prabhu B. Patil<sup>1</sup> and Suresh Korpole<sup>1‡</sup>

1. CSIR-Institute of Microbial Technology, Chandigarh, India. 2. Institute of Chemistry, Federal University of Goiás, Goiânia, GO, Brazil 3. Centro de Análises Proteômicas e Bioquímicas, Pós-graduação em Ciências Genômicas e Biotecnologia, Brasília, Brazil 4. S-Inova, Programa de Pós-Graduação em Biotecnologia, Universidade Católica Dom Bosco, Campo Grande, MS, Brazil

**Supplementary Table 1:** Identity of putative homologous genes involved in biosynthesis of penisin (9.8 Kb region).

| ORF   | Size of putative protein (aa) | Putative function                     | Sequence homolog (Genbank accession)                                         | Identities (%) |
|-------|-------------------------------|---------------------------------------|------------------------------------------------------------------------------|----------------|
| penR  | 269                           | Transcriptional regulator             | transcriptional regulator [Paenibacillus elgii], WP_010497942.1              | 92%            |
| penD  | 561                           | Dehydratase                           | dihydroxy-acid dehydratase [Paenibacillus ehimensis], WP_025851100.1         | 99%            |
| penC  | 454                           | Cyclase                               | lanthionine synthetase C-like protein [Paenibacillus elgii], WP_010497958.1  | 92%            |
| penT  | 625                           | ABC transporter (ATP-binding protein) | ABC transporter ATP-binding protein [Paenibacillus sp. MSt1], WP_036689879.1 | 96%            |
| penB  | 1040                          | Biosynthesis                          | ElgB [Paenibacillus elgii B69], AFI99858.1                                   | 94%            |
| penA2 | 63                            | penisin                               | elgicins [Paenibacillus elgii B69], AFI99859.1                               | 74%            |
| penA1 | 64                            | penisin                               | elgicins [Paenibacillus elgii B69], AFI99859.1                               | 94%            |

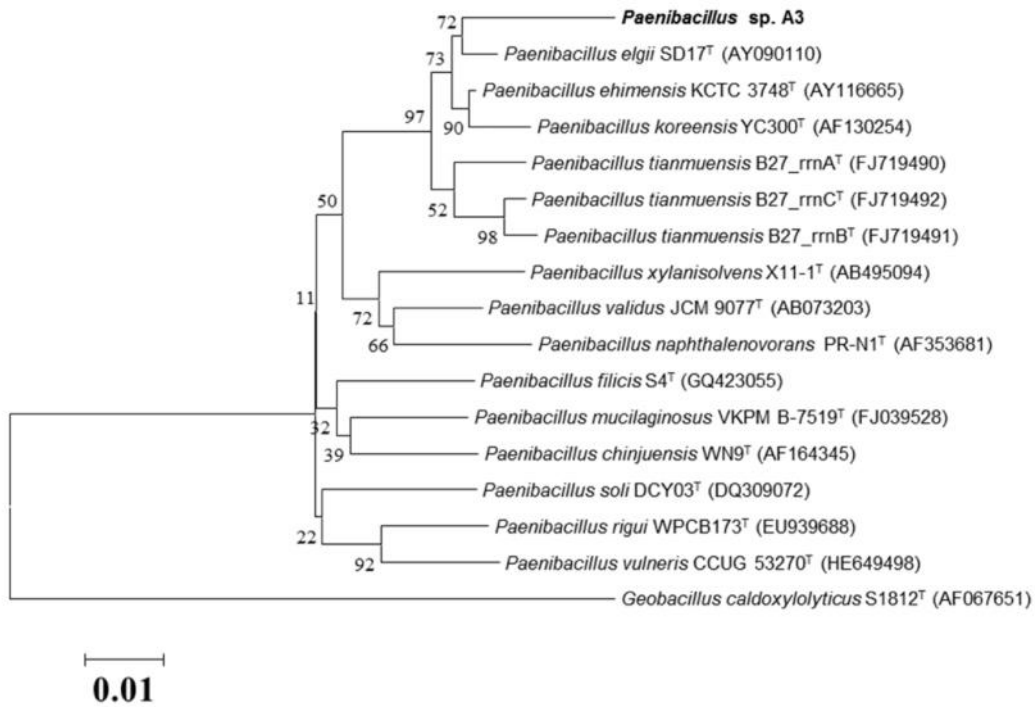

**Supplementary Figure S1:** Neighbor-joining phylogenetic tree based on 16S rRNA gene sequences of *Paenibacillus* species showing the phylogenetic relationship between strain A3 and other members. Bootstrap values greater than 50% are given at the nodes. Bar indicates 0.01 substitutions per site.

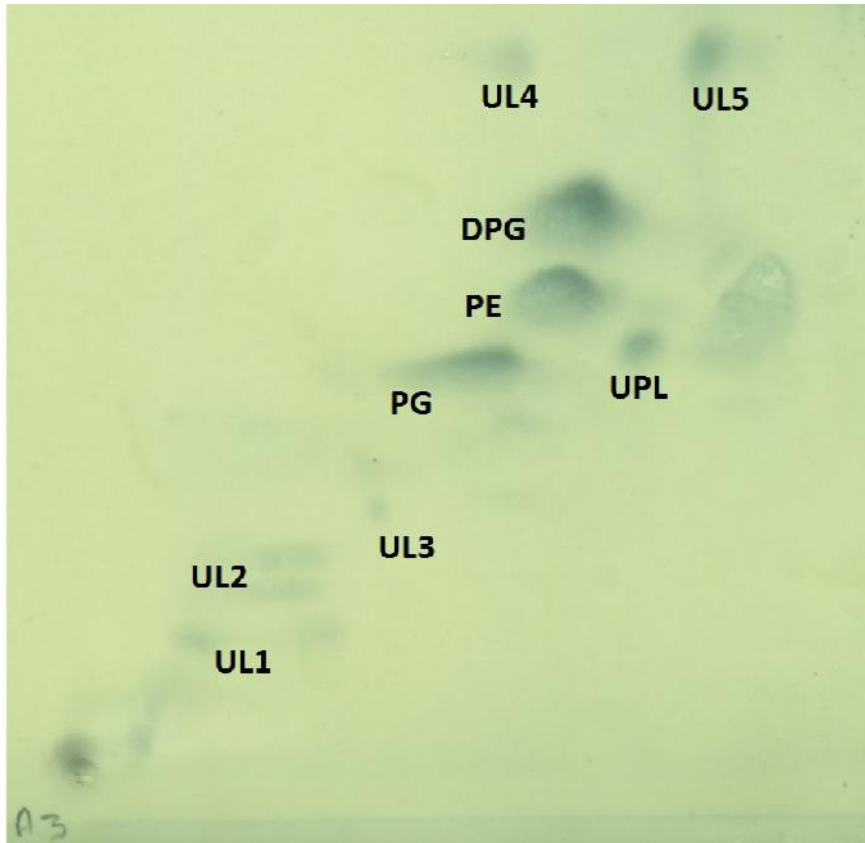

**Supplementary Figure S2:** Two dimensional TLC of total polar lipid analysis of strain A3. The total polar lipids were detected by spraying with 5% phosphomolybdate and identified based on R<sub>f</sub> values obtained for species of the genus *Paenibacillus*.

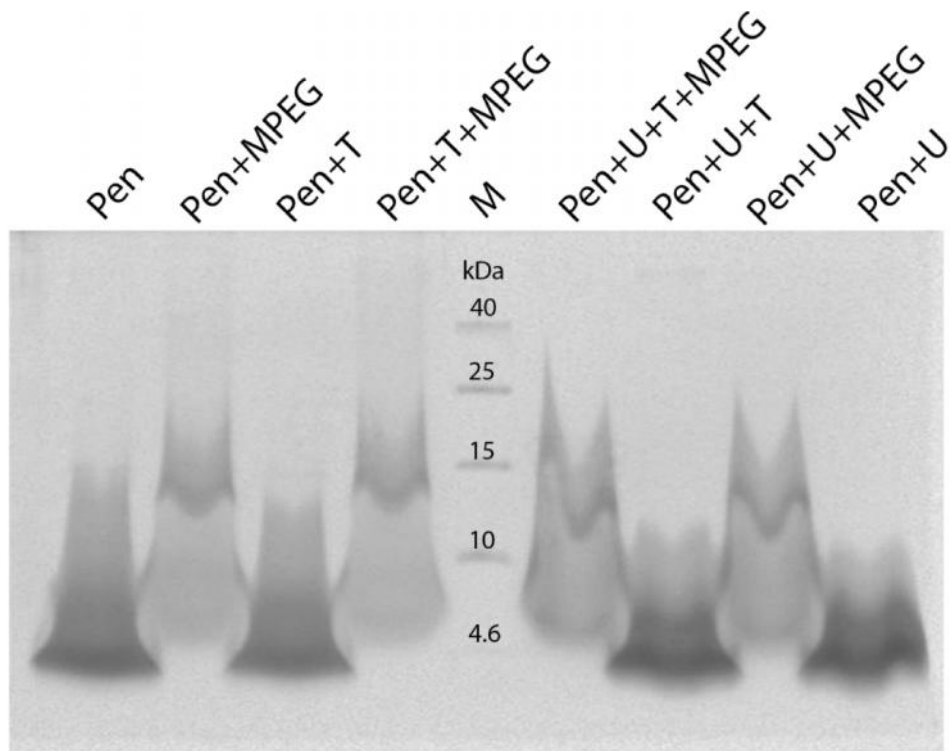

**Supplementary Figure S3:** Pegylation assay of purified penisin with MPEG (maleimide PEG, 5 kDa) in presence of TCEP (*tris*(2-carboxyethyl)phosphine) to access the presence of free cysteine. Same assay has been done in the presence of denaturing agent, Urea. MPEG; maleimide PEG, 5 kDa, T; *tris*(2-carboxyethyl)phosphine, U; urea.

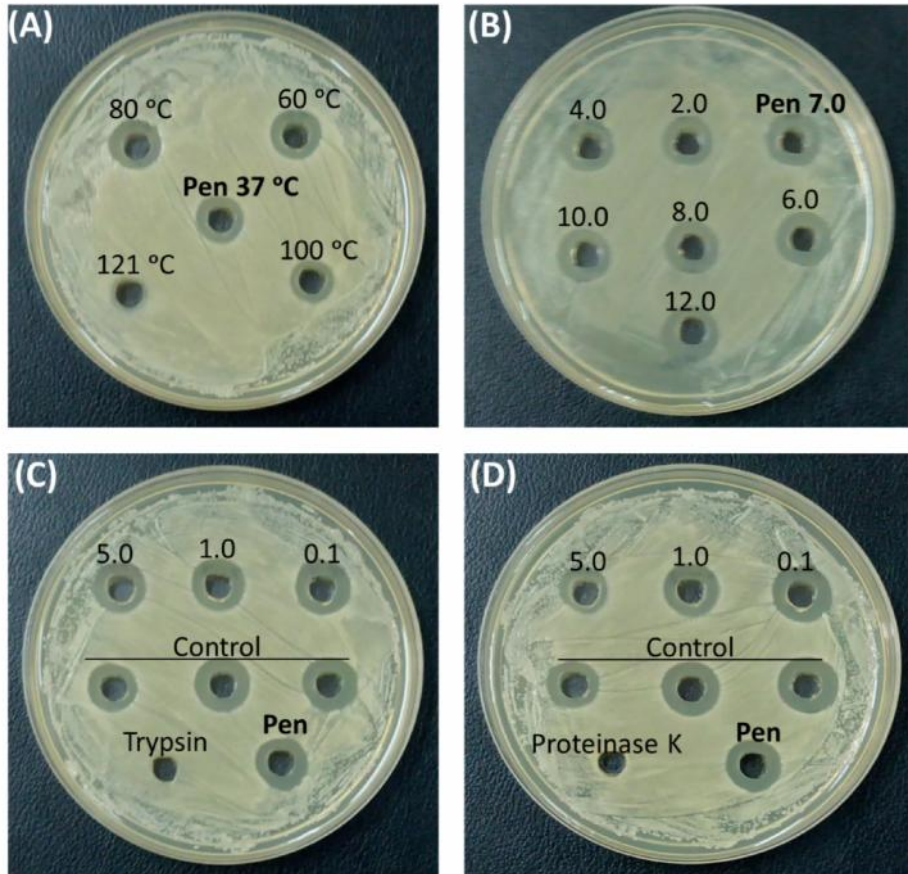

**Supplementary Figure S4:** Temperature, pH and protease test of penisin. (A) Well diffusion assay of penisin after treatment at different temperatures for 30 min. Penisin at 37°C used as a control. (B) Well diffusion of penisin at different pH range (penisin at 7.0 served as control). (C) Well diffusion assay of penisin after 6 h treatment with trypsin. Untreated penisin used as a control. (D) Well diffusion assay of penisin after 6 h treatment with proteinase K. Untreated penisin served as a control.
